# Supplementary material for: Differential influence of additives on the various stages of insulin aggregation
Source: Royal Society of Chemistry journal article supplement (doi:10.1039/c5ra27206h), 2016-01-01
Supplement: c5ra27206h1.pdf [file c5ra27206h1.pdf]

## Differential Influence of Additives on the Various Stages of Insulin Aggregation

Shivnetra Saha,<sup>§,a</sup> Anurag Sharma<sup>§,a</sup> and Shashank Deep<sup>\*,a</sup>

### Electronic Supporting Information

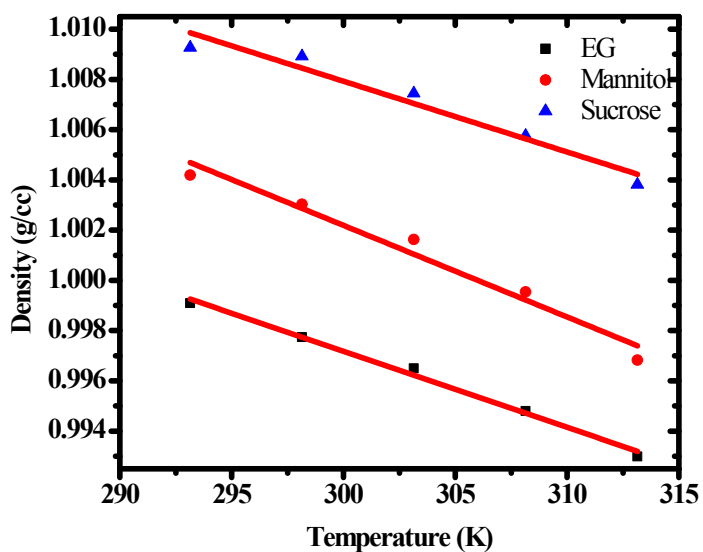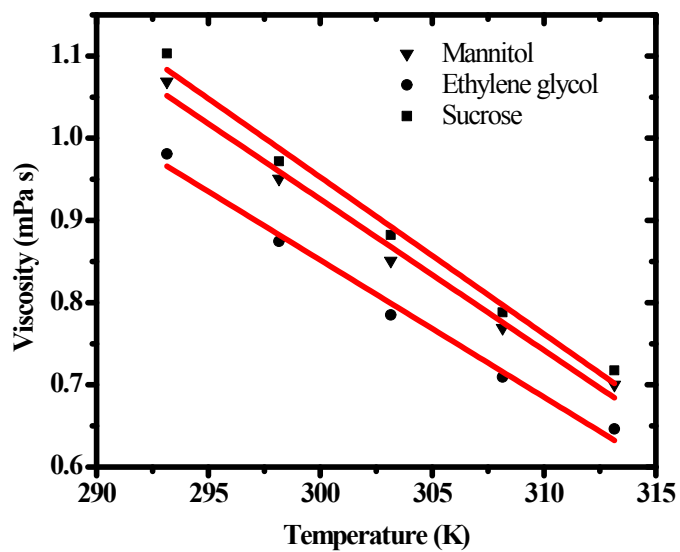

Fig. S1 Variation of densities and viscosities with temperature

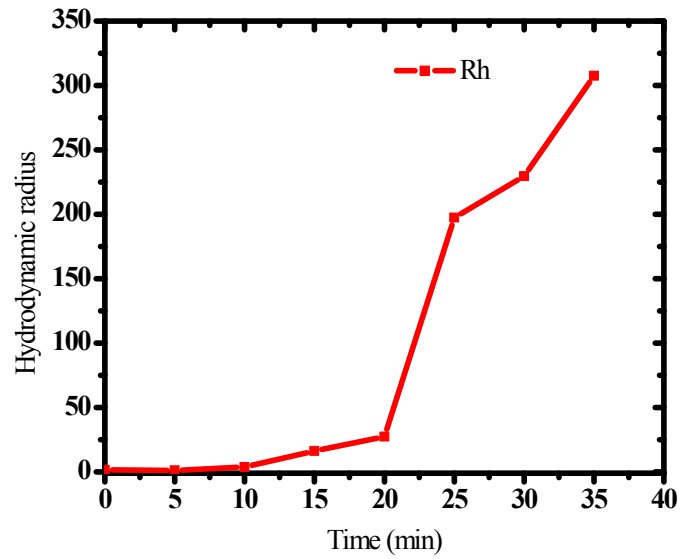

Fig. S2 Aggregation of insulin monitored by Dynamic Light Scattering

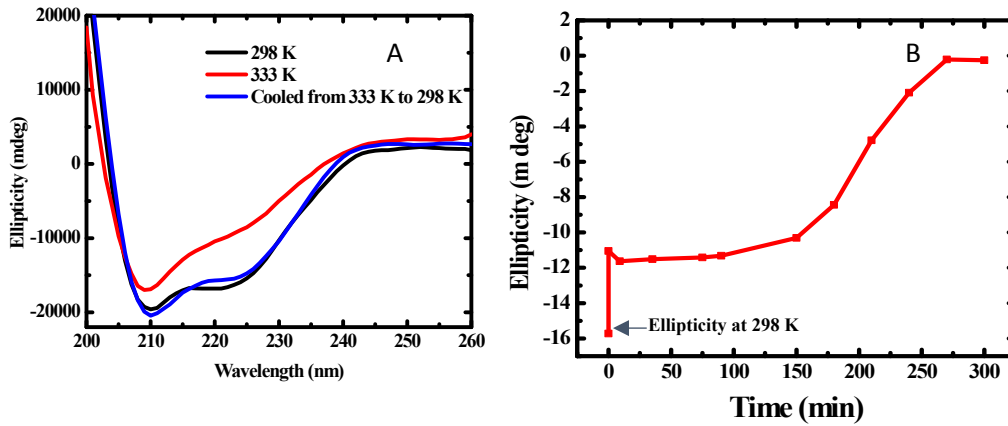

Fig. S3 Reversibility in the aggregation of insulin (A) The first unfolding step in the aggregation scheme is reversible . (B) The ellipticity at 333 K is less than that at 298 K, representing the phenomenon of unfolding. But the helicity at 333 K is retained for quite some time before aggregation can start, suggesting that unfolding is faster than association.

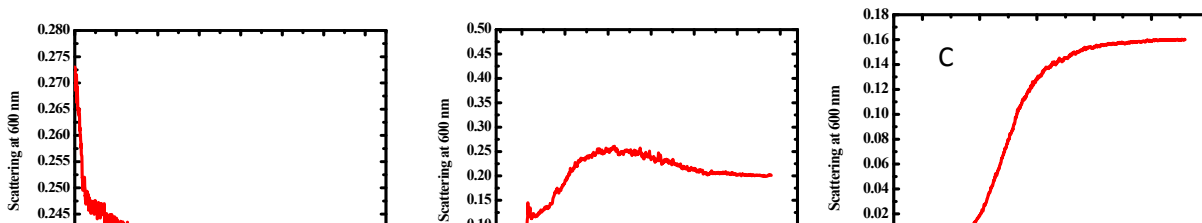

A

B

Fig. S4 (A) Aggregation of insulin was taken to completion. The solution was cooled, and then again put at 333 K. No aggregation was observed, suggesting that aggregation is irreversible. (B) Aggregation was stopped in the middle of the growth phase, solution was cooled , and the temperature was again raised to 333 K (C) Aggregation was stopped in the lag phase, solution was cooled , and the temperature was again raised to 333 K

Table 1. Parameters of aggregation of insulin at 333 K at pH 4.0

|                 | <b>t<sub>lag</sub>(min)</b> | <b>k<sub>app</sub>(min<sup>-1</sup>)</b> | <b>A<sub>max</sub></b> |
|-----------------|-----------------------------|------------------------------------------|------------------------|
| No additive     | 84.6±2.6                    | 0.076±0.006                              | 0.13±0.02              |
| Mannitol        | 126.0±3.1                   | 0.083±0.005                              | 0.11±0.06              |
| Ethylene glycol | 175.9±3.2                   | 0.084±0.008                              | 0.062±0.009            |
| Sucrose         | 127.7±2.8                   | 0.085±0.012                              | 0.11±0.05              |

Table 2. Parameters of aggregation of insulin at 333 K at pH 7.0

|                 | <b>t<sub>lag</sub>(min)</b> | <b>k<sub>app</sub>(min<sup>-1</sup>)</b> | <b>A<sub>max</sub></b> |
|-----------------|-----------------------------|------------------------------------------|------------------------|
| No additive     | 73.3±1.5                    | 0.0408±0.005                             | 0.36±0.04              |
| Mannitol        | 82.6±2.4                    | 0.0503±.006                              | 0.25±.06               |
| Ethylene glycol | 167.1±4.1                   | 0.026±0.004                              | 0.078±.006             |
| Sucrose         | 83.6±2.6                    | 0.062±.005                               | 0.11±.03               |
